# Supplementary material
Source: Springer Nature journal article supplement (https://www.springermedizin.de/resource/supplementary/12879_2011_1903_MOESM4_ESM.pdf/9443970)

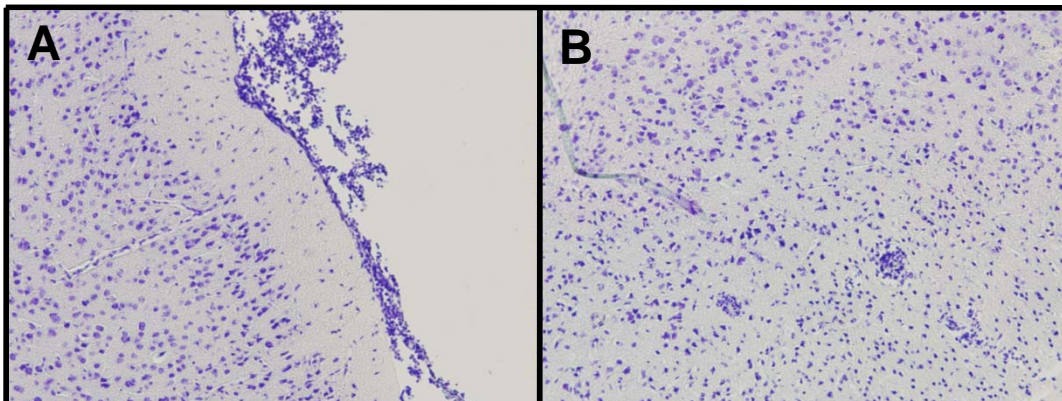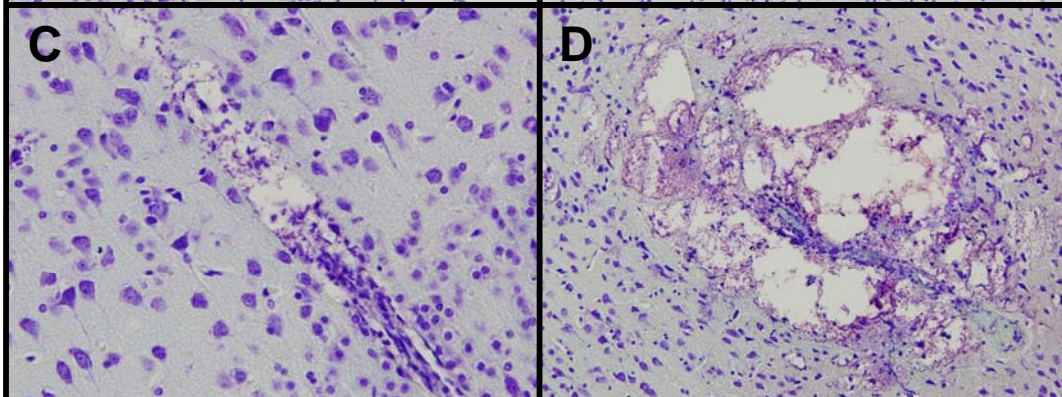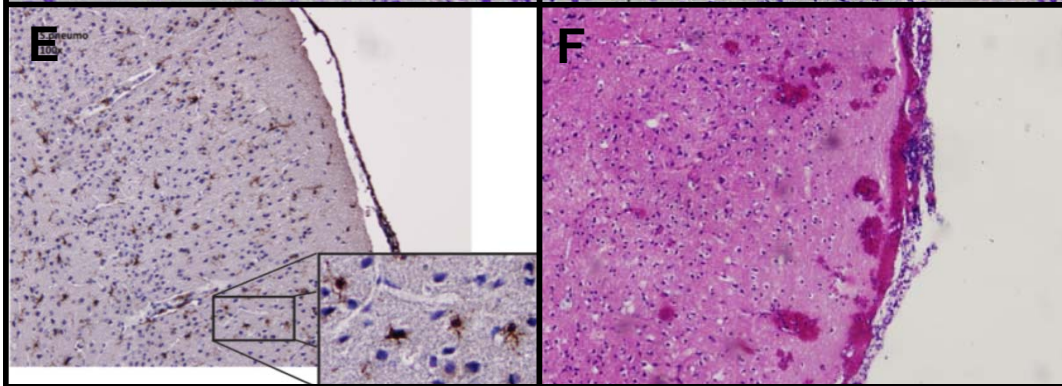

Supplement: MOESM4 [file 9443970]
